# 1 Midlife Health in Britain and the US: A 2 comparison of Two Nationally 3 Representative Cohorts

4 **Authors:** Charis Bridger Staatz <sup>1§\*</sup>, Iliya Gutin <sup>2\*</sup>, Andrea Tilstra <sup>3</sup>, Laura Gimeno <sup>1</sup>, Bettina Moltrecht <sup>1</sup>, Dario  
5 Moreno-Agostino <sup>1,4</sup>, Vanessa Moulton <sup>1</sup>, Martina K. Narayanan <sup>1</sup>, Jennifer B. Dowd <sup>3&</sup>, Lauren Gaydosh <sup>2&</sup>,  
6 George B. Ploubidis <sup>1&</sup>

7 \*Contributed Equally

8 § Corresponding Author

9 & Senior Authors

## 10 **Affiliations:**

11 <sup>1</sup> Centre for Longitudinal Studies, University College London, London, UK

12 <sup>2</sup> The University of Texas at Austin, Austin, Texas, USA

13 <sup>3</sup> Leverhulme Centre for Demographic Science, Nuffield College, and Nuffield Department of Population  
14 Health, University of Oxford, Oxford, UK

15 <sup>4</sup> ESRC Centre for Society and Mental Health, King's College London, London, UK

## 16 **Emails:**

17 [charis.staatz.17@ucl.ac.uk](mailto:charis.staatz.17@ucl.ac.uk), [iliya.gutin@austin.utexas.edu](mailto:iliya.gutin@austin.utexas.edu), [andrea.tilstra@demography.ox.ac.uk](mailto:andrea.tilstra@demography.ox.ac.uk),

18 [l.gimeno@ucl.ac.uk](mailto:l.gimeno@ucl.ac.uk), [b.moltrecht@ucl.ac.uk](mailto:b.moltrecht@ucl.ac.uk), [d.moreno@ucl.ac.uk](mailto:d.moreno@ucl.ac.uk), [vanessa.moulton@ucl.ac.uk](mailto:vanessa.moulton@ucl.ac.uk),

19 [m.narayanan@ucl.ac.uk](mailto:m.narayanan@ucl.ac.uk), [jennifer.dowd@demography.ox.ac.uk](mailto:jennifer.dowd@demography.ox.ac.uk), [lauren.gaydosh@austin.utexas.edu](mailto:lauren.gaydosh@austin.utexas.edu),

20 [g.ploubidis@ucl.ac.uk](mailto:g.ploubidis@ucl.ac.uk)

21 **Word Count:** 3513

NOTE: This preprint reports new research that has not been certified by peer review and should not be used to guide clinical practice.

22 Abstract

23 **Background:** Older adults in the United States (US) have worse health and wider socioeconomic inequalities in  
24 health compared to Britain. Less is known about how health in the two countries compares in midlife, a time of  
25 emerging health decline, including inequalities in health.

26 **Methods:** We compare measures of smoking status, alcohol consumption, obesity, self-rated health, cholesterol,  
27 blood pressure, and glycated haemoglobin using population-weighted modified Poisson regression in the 1970  
28 British Cohort Study (BCS70) in Britain (N= 9,665) and the National Longitudinal Study of Adolescent to  
29 Adult Health (Add Health) in the US (N=12,297), when cohort members were aged 34-46 and 33-43,  
30 respectively. We test whether associations vary by early- and mid-life socioeconomic position.

31 **Findings:** US adults had higher levels of obesity, high blood pressure and high cholesterol. Prevalence of poor  
32 self-rated health, heavy drinking, and smoking was worse in Britain. We found smaller socioeconomic  
33 inequalities in midlife health in Britain compared to the US. For some outcomes (e.g., smoking), the most  
34 socioeconomically advantaged group in the US was healthier than the equivalent group in Britain. For other  
35 outcomes (hypertension and cholesterol), the most advantaged US group fared equal to or worse than the most  
36 disadvantaged groups in Britain.

37 **Interpretation:** US adults have worse cardiometabolic health than British counterparts, even in early midlife.  
38 The smaller socioeconomic inequalities and better overall health in Britain may reflect differences in access to  
39 health care, welfare systems, or other environmental risk factors.

40 **Funding:** ESRC, UKRI, MRC, NIH, European Research Council, Leverhulme Trust

41

42 **Key Words:** Biomarkers; Cardio-metabolic health; cross-country comparison; mid-life; harmonisation;  
43 socioeconomic position; inequalities

44 **Research in context**

45 Evidence before this study

46 This study considered a range of seminal evidence published in academic journals, focusing on international  
47 comparisons of health, of which the majority has been conducted in older age cohorts (adults over the age of 50)  
48 in Britain and the US. We focused our search on cross-country comparisons and international surveys of ageing,  
49 such as the Health and Retirement Survey in the US, and the English Longitudinal Study of Ageing in Britain.  
50 We limited our search to English language publications and included studies that considered both overall  
51 differences in health, and differences in socioeconomic inequalities in health. The majority of considered  
52 studies found older adults in the US to have worse health than in Britain, and with greater evidence of  
53 inequalities for older adults in the US. However, older adults in Britain were more likely to exhibit worse health  
54 behaviours than those in the US.

55 Added value of this study

56 This study adds value by investigating health in early midlife (30s and 40s), a period less researched compared  
57 to older age. Midlife is an important time in the life course where early signs of decline can be observed and  
58 when there is still an opportunity to promote healthy aging. The importance of midlife is consistent with the  
59 need to understand healthy ageing as a life-long process. This study uses biomarkers as objective measures of  
60 cardiometabolic health and involved retrospective harmonisation of cohorts in Britain and the US, helping lay  
61 the groundwork for efforts to harmonise cohorts at younger ages and facilitate comparative work.

62 Implications of all the available evidence

63 We find that health in US adults is worse than their peers in Britain at even earlier ages (30s-40s years of age)  
64 than previously documented, especially for cardiometabolic measures. While associations of childhood  
65 socioeconomic status and later health were found in both Britain and the US, adult socioeconomic measures  
66 largely accounted for these associations. This finding is consistent with previous work and underscores the  
67 persistence of socioeconomic position across the life course, with sustained impacts on health. Policies aimed at  
68 improving health must consider this link between early and later life socioeconomic circumstances.

69 We also find wider socioeconomic inequalities in health outcomes in the US than Britain. For some outcomes  
70 the most advantaged groups in the US have similar or worse health than the most disadvantaged groups in  
71 Britain. These findings, along with previously published evidence, have implications for policy and practice, as

- 72 they suggest sociopolitical differences between the two countries that may drive different health profiles.
- 73 Systematic differences between Britain and the US in terms of health care and welfare provisions may drive
- 74 both worse health, and wider inequalities in the US.

## 75 Background

76 International comparisons document worse health in the United States (US) compared to England (1-5). Older  
77 US adults are less healthy based on measures of self-reported diabetes, hypertension, heart disease, myocardial  
78 infarction, stroke, lung disease, and cancer (2). They also have a higher average body mass index and prevalence  
79 of extreme obesity (4). However, older adults in England exhibit worse health behaviours, including the co-  
80 occurrence of smoking, alcohol consumption, and low physical activity, and were less likely to present with no  
81 behavioural risk factors (1).

82 Previous comparisons of health in the US and England have primarily focused on ages 50 (late midlife) or 60  
83 and over (old age) based on harmonised international surveys of ageing (6). Midlife (ages 30-60), and  
84 particularly younger midlife (ages 30-40), is often overlooked in life course research on health (7). Yet, there is  
85 growing recognition of midlife as an important period that sets the stage for later life health and aging, marking  
86 the start of physical and functional decline (8). In contrast to US-England health differences at older ages, the  
87 limited evidence at younger ages is more equivocal. One comparison finds similar patterns of worse  
88 cardiometabolic health but better health behaviours in the US compared to England at ages 35-54 (5).  
89 Conversely, a more recent study examining individuals born between 1965-80 documents higher prevalence of  
90 hypertension and dyslipidaemia among English adults and comparable prevalence of smoking and diabetes risk  
91 (9, 10).

92 Moreover, these midlife declines in health likely exhibit social gradients. Studies comparing England and the  
93 US document wealth, income, and education inequalities across multiple chronic conditions for adults in their  
94 50s and 60s (2, 3), with some evidence of similar gradients at midlife (5, 11). In both countries, behavioral risk  
95 factors (obesity, exercise, and smoking) explain some of these gradients, but a sizeable proportion remains  
96 unaccounted for – indicative of the multiple mechanisms through which social disadvantages operate (3, 5).  
97 Many of these health inequalities originate even earlier in the life course, as multiple studies of British and US  
98 adults find strong associations between early life socioeconomic position (SEP) and adult health (12, 13).

99 Critically, international comparisons provide the opportunity to identify contextual drivers of population health,  
100 (14-16) with prior work finding smaller health inequalities in countries with higher national incomes, social  
101 transfers and health care expenditure and quality of health care and relevant policy (14). Observed differences  
102 between the US and England have been attributed to the cost of healthcare (2, 5), which is free at the point of  
103 access in the UK (England, Scotland, Wales and Northern Ireland), differences in income benefit systems (2, 3)

104 and the quality of local environments and neighbourhoods (17). These contextual determinants of health  
105 inequalities likely vary across the life course as the level of welfare provisions differs between countries and life  
106 stages (e.g., retirement benefits and childhood welfare).

107 Thus, we build on previous work and compare behavioural risk factors and biomarkers of health in early midlife  
108 from two nationally representative cohorts, the National Longitudinal Study of Adolescent to Adult Health (Add  
109 Health) in the US, and the 1970 British Cohort study (BCS70) in Britain (England, Wales, and Scotland). We  
110 consider the moderating role of early life SEP and current SEP. Drawing on past work, we hypothesise that the  
111 health of the US cohort will generally be worse than their British peers, and that US SEP inequalities will be  
112 larger.

## 113 Methods

### 114 Data Sets

115 BCS70 is an ongoing nationally representative birth cohort of ~17,000 individuals born in 1970 in Britain (18).  
116 Cohort members have been followed up ten times since birth. The tenth sweep, in 2016, collected multiple  
117 biomedical measures, including blood samples. The current analysis uses data from sweeps eight to ten, when  
118 cohort members were ages 34 (N=9,665), 42 (N=9,841) and 46 (N=8,851).

119 Add Health is a nationally representative cohort of ~20,000 individuals in the US enrolled in grades 7-12 (aged  
120 12-18) in 1994-1995 (19). The cohort has been followed up in four additional waves, with the most recent Wave  
121 V (N=12,297) occurring in 2016–18 (ages 33- 43). Biomedical measures were collected on a subsample of  
122 participants at Wave V (N=5,381).

### 123 Variables

124 Our outcome variables were smoking status; alcohol consumption; body mass index (BMI); self-rated health;  
125 cholesterol; blood pressure (BP, hypertension); and blood sugar level (glycated haemoglobin [HbA1c], a marker  
126 for diabetes). In BCS70, smoking status and alcohol consumption were measured at age 34, self-rated health at  
127 age 42, and all remaining measures at age 46. For Add Health, all measures were taken from Wave V. Outcomes  
128 were converted to binary variables using cut-offs shown in Supplementary Methods S1.

129 For chronic diseases (e.g., diabetes) measured through biomarkers (e.g., HbA1c), we distinguish between the  
130 biomarker alone, and “any” indication of the disease (e.g., reported as ‘any Diabetes’) which additionally draws  
131 on medication usage for the specific conditions.

132 For obesity, we distinguish between a measure based on measured height and weight, and a measure  
133 supplemented with self-reported height and weight (used in the main analysis). For alcohol, we define heavy  
134 drinking based on number of drinks, using US heavy drinking guidelines. Full details of the harmonisation of  
135 measures are shown in Methods S2.

136 Three measures of SEP were used: parental education (Add Health ages 11-19, BCS70 age 16), own education,  
137 and household income (Add Health ages 32-42, and BCS70 ages 34 and 42, dependent on the respective  
138 outcome). In both cohorts, parental education was grouped as: 1) neither parent has a university bachelor's  
139 degree; 2) at least one parent has a degree. Own education was also grouped based on completing a bachelor's  
140 degree. In both cohorts, own income was classified into approximate quintiles. For further details see Methods  
141 S2.

142 BCS70 is largely racially/ethnically homogenous, with most of the cohort born to parents who were themselves  
143 born in the UK or Europe (93%), and therefore likely White (see Methods S2 for further details). In Add Health,  
144 race/ethnicity was measured at Wave I; the primary analysis was restricted to non-Hispanic White adults to  
145 maximize comparability with BCS70.

146 In BCS70, the "age 46" biomedical sweep took place across 3 years (ages 46-48), while age in Add Health was  
147 calculated based on interview and birth date. In the remaining BCS70 sweeps, age was included as a dummy  
148 variable (i.e., 34 and 42). Sex assigned at birth was measured in the first sweep in BCS70 and at Wave I in Add  
149 Health.

## 150 Statistical Analysis

151 Modified Poisson regression analysis was used to obtain relative risk estimates (risk ratios [RR]) and  
152 corresponding 95% confidence intervals (CI), using Stata 17. In Model 1, the independent variable was a  
153 dummy variable for country (Britain or US) controlled for age. Model 1 was run in both pooled and sex-  
154 stratified samples. In the sensitivity analysis, the full, racially/ethnically heterogenous Add Health sample was  
155 used.

156 Model 2 examined modification in the associations between early life SEP (parental education) and current adult  
157 SEP (education and household income) and health, including interaction terms between country and SEP. For  
158 interpretation, RR estimates are presented as adjusted predicted marginal estimates of prevalence for each  
159 country and/or for each country at each level of SEP, estimated at the observed values of covariates (further

160 details are provided in Methods S3). A Wald test indicated whether SEP differences were significant between  
161 countries. For household income, the difference between the bottom, middle, and top quintile relative to the  
162 second quintile was tested for significance, controlled for household size.

163 Model 3 examined differences in the relationship between childhood SEP and adult health outcomes after  
164 controlling for adult education and household income. Models 2 and 3 were stratified by sex in supplementary  
165 analyses.

166 Sensitivity analyses compared models using clinically measured obesity in Add Health with the self-report  
167 supplemented measure used in the main analysis. Alternative harmonised measures of heavy drinking, based on  
168 UK and country specific guidelines, were also examined.

#### 169 Complex Survey Design and Non-Response Weights

170 Add Health uses a complex, stratified sampling strategy (19), thus maintaining the national representativeness of  
171 the data. Add Health also includes survey weights that account for non-representativeness among adults  
172 providing biomarker samples.

173 To ensure the complex survey design of Add Health and non-response was accounted for in analysis, non-  
174 response weights were developed in BCS70. The full method used to develop non-response weights, and to  
175 apply a complex survey design, is shown in Methods S4 & S5.

## 176 Results

### 177 Descriptives

178 Table 1 shows the weighted proportion of outcomes and covariates in the analytic samples (limited to non-  
179 Hispanic White in Add Health; unweighted distribution in Supplementary Results S1). In the US, there was  
180 higher prevalence of obesity, high blood pressure and cholesterol, whilst in Britain a higher proportion reported  
181 poor self-rated health, heavy drinking, and regular smoking. A higher proportion of the US sample had degree-  
182 level educated parents (36% versus 21%), whilst degree completion among cohort members was similar (40%  
183 versus 36%).

### 184 Model 1 – Comparison of health between Britain and the US

185 US adults generally had worse cardiometabolic health than in Britain (Figure 1, Table 2). They were more likely  
186 to have high blood pressure and cholesterol, before and after accounting for medication use (any hypertension:



187 0.309 [95% CI: 0.284, 0.335] vs 0.193 [95% CI: 0.181, 0.204] ; any high cholesterol: 0.159 [95% CI: 0.138,  
188 0.181] vs 0.097 [95% CI: 0.086, 0.107]), and more likely to have obesity (0.405 [95%CI: 0.384, 0.426] vs  
189 0.345 [95%CI: 0.332, 0.358]). However, British adults were more likely to be smokers (0.279 [95%CI: 0.268,  
190 0.290] vs 0.214 [95%CI: 0.195, 0.234]), heavy drinkers (0.190 [95% CI: 0.181,0.199 ] vs 0.121 [95% CI:  
191 0.110, 0.131]) and to have poor self-rated health (0.183 [95% CI: 0.172, 0.194] vs 0.122 [95%CI: 0.108,  
192 0.136]). They also had slightly higher HbA1c levels: 0.060 [95% CI: 0.051, 0.068] vs 0.044 [95% CI: 0.034,  
193 0.055].

194 In Britain and the US, men were more likely to have high blood pressure and cholesterol compared to women.  
195 Men were also more likely to be heavy drinkers in the US and to be regular smokers in Britain. The male health  
196 disadvantage was greater in the US for heavy drinking and high cholesterol and blood pressure. In Britain, there  
197 was a larger male disadvantage for smoking.

## 198 Model 2 – Socioeconomic inequalities between Britain and the US

199 Socioeconomic inequalities in midlife health were greater for adult SEP compared to childhood SEP in both  
200 cohorts (Figure 2, Results S2). The probability of being a regular smoker and reporting poor self-rated health  
201 was higher for individuals in the bottom income quintile, and for those without a degree. There were no  
202 differences in the probability of heavy drinking by SEP in the US, whilst more advantaged British adults (based  
203 on income and parents' education) were more likely to be heavy drinkers.

204 In Britain and the US there was a small SEP gradient in hypertension and cholesterol, but this was only  
205 significant for adulthood education. There was no difference between middle- and low-income groups in the  
206 probability of obesity in Britain (Figure 2 Panel C, 0.366 [95%CI: 0.334, 0.397] vs 0.358 [95%CI: 0.320,  
207 0.396]), but there was a difference between the highest and middle/lowest income quintiles. In the US there was  
208 a clearer income gradient for obesity (Panel C, low: 0.501 [95%CI: 0.454, 0.549], middle: 0.425 [95%CI:  
209 0.390, 0.459], top: 0.236 [95%CI: 0.199, 0.273]). Both countries had gradients by education, which were  
210 stronger for participants' rather than parent's education. Results were similar when looking at males and females  
211 separately (Results S3).

212 For some outcomes, such as smoking, the most socioeconomically advantaged US adults were healthier than  
213 their British peers, but the most disadvantaged were worse off than the equivalent group in Britain, resulting in  
214 wider inequalities (Figure 2, Panel C, smoking. US top income: 0.067 [95%CI: 0.046, 0.087]; Britain top  
215 income: 0.182 [95%CI: 0.160, 0.203]; US bottom income: 0.459 [95%CI: 0.421, 0.497]; Britain bottom

216 income: 0.416 [95%CI: 0.387, 0.445]). This was observed to a lesser extent for income differences in “any”  
217 diabetes.

218 For other outcomes, such as obesity, levels were similar among advantaged groups in Britain and the US, whilst  
219 disadvantaged US adults had higher obesity levels than in Britain, resulting in wider inequalities. Conversely,  
220 wider inequalities in self-rated health were the result of better self-rated health among advantaged US adults  
221 relative to Britain, despite similarly poor health among disadvantaged groups.

222 Finally, for some outcomes, such as hypertension and cholesterol, those in the most advantaged position in the  
223 US had similar or worse health than disadvantaged groups in Britain, particularly as measured by parental or  
224 adult education (Figure 2, Panel C, own education level and “any” hypertension. US has a degree: 0.240  
225 [95%CI: 0.209, 0.272]; Britain does not have a degree: 0.164 [95%CI: 0.149, 0.179]). This pattern was also  
226 observed for obesity and parental SEP.

### 227 Model 3 – Attenuation of associations with early life SEP

228 Model 3 examined associations between childhood SEP and adult health, controlling for adult SEP (Figure 3).  
229 Compared with Figure 2 Panel A, the associations between childhood SEP and most health outcomes were  
230 attenuated. However, this was not the case for smoking, where differences remained in the US. Conversely,  
231 inequalities remained largely unchanged in Britain for heavy drinking when accounting for adult SEP, compared  
232 to no inequality in the US. Results were similar when looking at males and females separately (Results S4),  
233 except for inequalities in HbA1c among males in Britain.

### 234 Sensitivity Analysis

235 Results using the full racially and ethnically diverse Add Health sample were similar to the main analysis  
236 (Results S5), with the exception of “any” diabetes, which was significantly higher in the US. In general, the gap  
237 between the two countries was smaller for heavy drinking, smoking, and self-rated health, but larger for obesity,  
238 high blood pressure, cholesterol, and blood glucose.

239 The results were also consistent when limiting obesity to directly measured height and weight in Add Health  
240 (Results S6). While the overall prevalence of obesity was higher in the US based on clinically assessed  
241 measures, conclusions were unchanged.

242 Finally, different operationalisations of heavy drinking (Methods S2 and Results S7) show that a US definition  
243 of heavy drinking based on number of alcoholic drinks results in a higher prevalence of heavy drinking in

244 Britain, with SEP inequalities observed in Britain only. Comparatively, using a UK definition based on units,  
245 levels of heavy drinking were similar between Britain and the US with little evidence of inequalities in drinking  
246 behavior (except own education in the US). When using country specific definitions (based on UK guidelines  
247 for units in BSC70, and US guidelines for number of drinks in Add Health) – therefore capturing excess  
248 drinking based on country specific guidelines– heavy drinking was more common in the US compared to  
249 Britain, with little evidence of inequalities in either cohort.

## 250 Discussion

251 Our analyses identified a US health disadvantage at midlife similar to that observed at older ages (1-4). The  
252 health disadvantage is notable for obesity, high blood pressure and cholesterol, whilst Britain exhibits greater  
253 prevalence of smoking, heavy drinking, and worse self-rated health. Our results demonstrate that socioeconomic  
254 inequalities are typically wider in the US, where health differences between the most and least advantaged are  
255 larger. For smoking, and to a lesser extent diabetes, this is due to better health among the most advantaged in the  
256 US but worse health among the most disadvantaged compared to Britain. For hypertension and high cholesterol,  
257 the most advantaged adults in the US have health that is equivalent to (or worse than) the most disadvantaged  
258 adults in Britain. In both countries, socioeconomic inequalities in health were typically wider for adult SEP than  
259 parent’s SEP; likewise, most of the associations with parental SEP were attenuated by adult SEP.

260 Our finding that hypertension and high cholesterol are more frequent in the US supports previous research  
261 documenting worse cardiometabolic health among older US adults (2, 4). While research on midlife is more  
262 limited, our results also find a US disadvantage with respect to obesity and cardiometabolic health (5) but differ  
263 from work suggesting worse hypertension and dyslipidaemia among more recent midlife cohorts in England  
264 (10). Sensitivity analyses found that the risk of diabetes in the US was higher only when considering the full  
265 ethnically heterogenous sample in Add Health. This finding differs from previous work documenting double the  
266 diabetes prevalence among US older adults compared to England (2), even in a non-Hispanic White sample,  
267 suggesting a possible increase in diabetes risk among younger British cohorts (10). Nevertheless, we find  
268 substantial evidence of poor health in midlife among both cohorts, supporting prior literature on declines in  
269 midlife health, such as higher prevalence of obesity, psychological distress and multimorbidity in Britain (20-  
270 22), and increases in midlife mortality in the US (23). Indeed, our work highlights the importance of studying  
271 healthy ageing as a process that occurs across the whole lifespan (7, 24).

272 Previous work found the co-occurrence of risky behaviours, including smoking and drinking (1, 5), to be more  
273 common among older and middle-aged adults in England than the US. This is consistent with the higher  
274 prevalence of unhealthy behaviours in Britain compared to a higher burden of chronic disease risk in the US  
275 observed in our study. This seeming contradiction suggests that the US health disadvantage is attributable to a  
276 multitude of mechanisms (e.g., diet, physical activity, and other health-relevant lifestyle factors) that future  
277 research should examine.

278 However, we caution that the harmonization of self-reported measures of health remains a challenge in  
279 internationally comparative research, where the subjective nature of both interpretation and reporting is  
280 important to account for. For example, in supplementary materials (Results S7, Discussion S1) we show how  
281 results differ based on the operationalization of heavy drinking, and the extent to which more or less  
282 conservative definitions and cutoffs might capture different ends of the distribution of drinking behaviours, in  
283 turn driving observed differences between countries and SEP gradients.

284 For several outcomes we find that the most socioeconomically advantaged respondents in the US have equal or  
285 worse health compared to the most disadvantaged in Britain. This may reflect different sociopolitical contexts  
286 between the two countries. For example, the US and UK health care systems differ substantially (25). The UK  
287 has the National Health Service, which is universally available and free at the point of access. In the US,  
288 healthcare is largely covered by private health insurance, Medicare or through an individual's own finances, and  
289 the associated costs are often high. Past work has suggested that relatively "universal" access to healthcare at  
290 older ages in the US through Medicare helps explain its better international standing in mortality and morbidity  
291 for medically amenable causes of death (26). However, comparisons of income gradients in health at older ages  
292 (70-80 years of age) between England and the US found no differences in England compared to a clear gradient  
293 in the US. As the authors note, this is likely due to a more generous benefit system for older adults in England  
294 where, below the median income, retirement benefits are largely consistent and unrelated to historic income (3).

295 It is also possible that differences between the US and Britain reflect broader inequalities affecting health across  
296 the life course. Societies with higher levels of inequality perform worse in international comparisons across a  
297 range of health indicators (27). The impact of socioeconomic inequalities within each country may be relevant  
298 to the present study's finding of worse health in the US, where the unique combination of high inequality and a  
299 weak welfare state in the US proves particularly harmful across *all* groups.

## 300 Strengths and Limitations

301 This research utilises data from two nationally representative cohort studies in Britain and the US, exploring  
302 health differences on a range of outcomes, including physical measurements. BCS70 is representative of the  
303 population at time of recruitment; however, most of the cohort are White and it was thus not possible to make  
304 similar adjustments for race/ethnicity in both studies. Also, for biomedical measures, the age at which measures  
305 were collected did not fully overlap between Add Health and BCS70. Moreover, there likely remains residual  
306 confounding for associations with SEP across the outcomes considered.

307 Our extensive harmonisation of measures between the two cohorts included the development of novel weights in  
308 BCS70, allowing for comparative analysis that accounts for Add Health's complex survey design. Despite  
309 efforts to address attrition through use of non-response weights, the derivation of weights was not identical, and  
310 some residual bias remains.

311 As is the case with harmonisation, there may be residual differences in how variables were measured and  
312 understood. This is especially problematic for subjective measures such as smoking, drinking, and self-rated  
313 health, where questions are asked and/or possibly interpreted differently. This work highlights a need for better  
314 international harmonisation of longitudinal studies at younger ages given the success of previous efforts in  
315 providing evidence on health disparities at older ages.

## 316 Conclusion

317 We find that US adults in midlife have worse cardiometabolic health than those in Britain, as well as wider SEP  
318 inequalities for multiple health outcomes. For some cardiometabolic outcomes, even the most advantaged SEP  
319 groups in the US have worse health than all groups in Britain. Our work also highlights the need for more efforts  
320 to harmonise international datasets at younger ages, and additional research that explores specific contextual  
321 drivers of international differences in health and inequalities in midlife.

322

## 323 Author Contribution

324 CBS and IG contributed equally to manuscript, and therefore have the right to list themselves as first author  
325 when presenting or using this work. CBS was responsible for data preparation, harmonisation of variables across  
326 the cohorts, derivation of non-response weights in BCS70, writing, preparation and reviewing of the manuscript.  
327 IG was responsible for data preparation, harmonisation of variables across the cohorts, running the analysis,  
328 writing, preparation and reviewing of the manuscript. AT was responsible for creation of figures, writing,  
329 preparation and reviewing of the manuscript. LGi, MN and VM contributed to development of code and/or  
330 harmonisation of variables and reviewing of the manuscript. GP, JBD and LGa are the senior authors on this  
331 paper, who were responsible for project development, supervision and reviewing of the manuscript. All authors  
332 contributed to initial conceptualisation and design of the research and reviewed the manuscript.

## 333 Funding

334 This research was supported by: by the ERSC [ES/V012789/1] and the National Institute of Health Research  
335 [COV-LT-0009-28654] (CBS); the Leverhulme Trust (Grant RC-2018-003) for the Leverhulme Centre for  
336 Demographic Science (AT, JD); European Research Council (ERC-2021-CoG-101002587) (AT, JD), the UK  
337 Research and Innovation (UKRI) under the UK government's Horizon Europe funding guarantee EP/X027678/1  
338 (AT); the UK Medical Research Council (grant number MR/N013867/1 to LGi); and the ESRC Centre for  
339 Society and Mental Health at King's College London [ES/S012567/1] (DM). The Centre for Longitudinal  
340 Studies is supported by the ESRC [grant numbers ES/M001660/1 and ES/W013142/1]. The views expressed are  
341 those of the authors and not those of the funders.

342 This work was also supported by a grant, P30AG066614, awarded to the Center on Aging and Population  
343 Sciences at The University of Texas at Austin by the National Institute on Aging, and by grant, P2CHD042849,  
344 awarded to the Population Research Center at The University of Texas at Austin by the Eunice Kennedy Shriver  
345 National Institute of Child Health and Human Development (IG, LGa). The content is solely the responsibility  
346 of the authors and does not necessarily represent the official views of the National Institutes of Health.

347 This research uses data from Add Health, funded by grant P01 HD31921 (Harris) from the *Eunice Kennedy*  
348 *Shriver National Institute of Child Health and Human Development* (NICHD), with cooperative funding from  
349 23 other federal agencies and foundations. Add Health is currently directed by Robert A. Hummer and funded  
350 by the National Institute on Aging cooperative agreements U01 AG071448 (Hummer) and U01AG071450

351 (Aiello and Hummer) at the University of North Carolina at Chapel Hill. Add Health was designed by J. Richard  
352 Udry, Peter S. Bearman, and Kathleen Mullan Harris at the University of North Carolina at Chapel Hill.

### 353 Data Sharing

354 All data in BCS70 is available through an end user license through UKDS:

355 <https://beta.ukdataservice.ac.uk/datacatalogue/series/series?id=200001>. Add Health data can be accessed through

356 a data application, see further details here: <https://addhealth.cpc.unc.edu/data/> . All code associated with the

357 current analysis can be found in the following OSF repository:

358 [https://osf.io/vkf2g/?view\\_only=89368400bf79432581a66fc681d914e7](https://osf.io/vkf2g/?view_only=89368400bf79432581a66fc681d914e7)

### 359 Acknowledgements

360 We thank the study participants for their continued involvement in BCS70 and Add Health, as well as CLS

361 colleagues who contributed to early discussions around this work (Jenny Chanfreau and Alice Goisis). We are

362 grateful for feedback provided on previous versions of this work, that were presented at the British Society for

363 Population Studies conference in September 2023, the Interdisciplinary Association for Population Health

364 Science in October 2023, and the Society for Longitudinal and Lifecourse Studies in October 2023.

365

366 Tables and Figures

367 **Table 1.** Weighted distribution of outcomes and covariates in BCS70 and Add Health in analytic sample (non-  
368 Hispanic White only).

|                                               | <b>BCS70</b>          | <b>Add Health</b>     |
|-----------------------------------------------|-----------------------|-----------------------|
|                                               | <i>% or mean (SD)</i> | <i>% or mean (SD)</i> |
| <b><i>Alcohol Consumption</i></b>             |                       |                       |
| Heavy Drinker                                 | 19.0                  | 12.1                  |
| Non-Heavy Drinker                             | 81.0                  | 87.9                  |
| <b><i>Smoking Status</i></b>                  |                       |                       |
| Regular Smoker                                | 27.9                  | 21.4                  |
| Non-Smoker                                    | 72.1                  | 78.6                  |
| <b><i>Self-Rated Health</i></b>               |                       |                       |
| Poor/Fair Health                              | 18.3                  | 12.1                  |
| Good/Excellent Health                         | 81.7                  | 87.9                  |
| <b><i>Obesity</i></b>                         |                       |                       |
| Obese                                         | 34.5                  | 40.4                  |
| Not Obese                                     | 65.5                  | 59.6                  |
| <b><i>High Blood Pressure (Biomarker)</i></b> |                       |                       |
| Hypertension                                  | 19.0                  | 22.5                  |
| Normal                                        | 81.0                  | 77.5                  |
| <b><i>High Cholesterol (Biomarker)</i></b>    |                       |                       |
| Unhealthy                                     | 7.63                  | 10.7                  |
| Healthy                                       | 92.4                  | 89.3                  |
| <b><i>High HbA1C (Biomarker)</i></b>          |                       |                       |
| Diabetes                                      | 5.96                  | 4.41                  |
| No Diabetes                                   | 94.0                  | 95.6                  |
| <b><i>Any Hypertension</i></b>                |                       |                       |
| Yes                                           | 19.3                  | 30.4                  |
| No                                            | 80.7                  | 69.6                  |
| <b><i>Any High Cholesterol</i></b>            |                       |                       |
| Yes                                           | 9.67                  | 15.3                  |



|                                                                                       |      |      |
|---------------------------------------------------------------------------------------|------|------|
| No                                                                                    | 90.3 | 84.7 |
| <b><i>Any Diabetes</i></b>                                                            |      |      |
| Yes                                                                                   | 7.27 | 8.14 |
| No                                                                                    | 92.7 | 91.9 |
| <b><i>Sex</i></b>                                                                     |      |      |
| Male                                                                                  | 55.3 | 50.4 |
| Female                                                                                | 44.7 | 49.6 |
| <b><i>Parental Education Level</i></b>                                                |      |      |
| Neither parent has a degree                                                           | 79.3 | 64.2 |
| At least one parent has a degree                                                      | 20.7 | 35.8 |
| <b><i>Own Education Level</i></b><br><b><i>(Add Health Wave V, BCS70 Sweep 9)</i></b> |      |      |
| No university degree                                                                  | 64.5 | 60.3 |
| Degree-level educated                                                                 | 35.5 | 39.7 |
| <b><i>Own Education Level</i></b><br><b><i>(BCS70 Sweep 8 only)</i></b>               |      |      |
| No university degree                                                                  | 63.7 | -    |
| Degree-level educated                                                                 | 36.3 | -    |
| <b><i>Own Income</i></b><br><b><i>(Add Health Wave V, BCS70 Sweep 9)</i></b>          |      |      |
| Lowest income quintile                                                                | 25.4 | 17.7 |
| Second quintile                                                                       | 20.6 | 24.3 |
| Middle quintile                                                                       | 18.4 | 17.4 |
| Fourth quintile                                                                       | 17.9 | 22.0 |
| Highest income quintile                                                               | 17.6 | 18.6 |
| <b><i>Own Income</i></b><br><b><i>(BCS70 Sweep 8 only)</i></b>                        |      |      |
| Lowest income quintile                                                                | 22.3 | -    |
| Second quintile                                                                       | 20.9 | -    |
| Middle quintile                                                                       | 19.4 | -    |
| Fourth quintile                                                                       | 18.4 | -    |
| Highest income quintile                                                               | 18.9 | -    |

369

|     | <i>Age*</i>              |             |             |
|-----|--------------------------|-------------|-------------|
| 370 | Wave V (Add Health Only) | -           | 37.4 (1.78) |
| 371 | Sweep 10 (BCS70 Only)    | 46.8 (0.77) | -           |
| 372 | Sweep 9 (BCS70 Only)*    | 42          | -           |
| 373 | Sweep 8 (BCS70 Only)*    | 34          | -           |

374 **Table 1 Footnote:** For all outcomes the values in the table represent weighted proportions (%), apart from age  
375 which represents mean and SD. \* Age at sweep 9 and 8 in BCS70 is included as a dummy variable, for the  
376 respective age in years at interview. Therefore, standard deviation for these ages is equal to 0, as all cohort  
377 members are allocated the same age in years.

**Table 2.** Marginal estimates from modified Poisson regression for Model 1, examining country differences in health outcomes: overall and sex stratified.

|                          |        | <i>Britain</i> |              |              | <i>United States</i> |              |              | P Value<br>Difference* |
|--------------------------|--------|----------------|--------------|--------------|----------------------|--------------|--------------|------------------------|
|                          |        | Estimates      | Lower 95% CI | Upper 95% CI | Estimates            | Lower 95% CI | Upper 95% CI |                        |
|                          |        |                |              |              |                      |              |              |                        |
| <i>Heavy Drinking</i>    | All    | 0.190          | 0.181        | 0.199        | 0.121                | 0.110        | 0.131        | <0.0001                |
|                          | Males  | 0.190          | 0.177        | 0.203        | 0.147                | 0.130        | 0.163        | <0.0001                |
|                          | Female | 0.197          | 0.186        | 0.209        | 0.096                | 0.084        | 0.108        | <0.0001                |
|                          |        |                |              |              |                      |              |              |                        |
| <i>Smoking</i>           | All    | 0.279          | 0.268        | 0.290        | 0.214                | 0.195        | 0.234        | <0.0001                |
|                          | Males  | 0.299          | 0.283        | 0.316        | 0.225                | 0.201        | 0.250        | <0.0001                |
|                          | Female | 0.251          | 0.237        | 0.264        | 0.205                | 0.183        | 0.227        | 0.0006                 |
|                          |        |                |              |              |                      |              |              |                        |
| <i>Self-rated Health</i> | All    | 0.183          | 0.172        | 0.194        | 0.122                | 0.108        | 0.136        | <0.0001                |
|                          | Males  | 0.180          | 0.164        | 0.196        | 0.127                | 0.112        | 0.142        | <0.0001                |
|                          | Female | 0.185          | 0.170        | 0.200        | 0.117                | 0.098        | 0.135        | <0.0001                |
|                          |        |                |              |              |                      |              |              |                        |
| <i>Obesity</i>           | All    | 0.345          | 0.332        | 0.358        | 0.355                | 0.335        | 0.375        | <0.0001                |
|                          | Males  | 0.355          | 0.335        | 0.375        | 0.410                | 0.387        | 0.432        | 0.0003                 |
|                          | Female | 0.333          | 0.314        | 0.352        | 0.398                | 0.366        | 0.430        | 0.0006                 |

|                                     |        |       |       |       |       |       |       |         |
|-------------------------------------|--------|-------|-------|-------|-------|-------|-------|---------|
|                                     |        |       |       |       |       |       |       |         |
| <i>High BP (Biomarker)</i>          | All    | 0.190 | 0.179 | 0.202 | 0.226 | 0.205 | 0.247 | 0.0035  |
|                                     | Males  | 0.242 | 0.223 | 0.260 | 0.293 | 0.261 | 0.325 | 0.0066  |
|                                     | Female | 0.138 | 0.124 | 0.152 | 0.158 | 0.130 | 0.186 | 0.209   |
|                                     |        |       |       |       |       |       |       |         |
| <i>High Cholesterol (Biomarker)</i> | All    | 0.076 | 0.067 | 0.086 | 0.108 | 0.092 | 0.124 | 0.0006  |
|                                     | Males  | 0.121 | 0.105 | 0.138 | 0.165 | 0.136 | 0.193 | 0.0094  |
|                                     | Female | 0.029 | 0.021 | 0.037 | 0.052 | 0.039 | 0.064 | 0.0028  |
|                                     |        |       |       |       |       |       |       |         |
| <i>High HbA1c (Biomarker)</i>       | All    | 0.060 | 0.051 | 0.068 | 0.044 | 0.034 | 0.055 | 0.024   |
|                                     | Males  | 0.067 | 0.056 | 0.079 | 0.045 | 0.029 | 0.060 | 0.0201  |
|                                     | Female | 0.046 | 0.034 | 0.058 | 0.043 | 0.030 | 0.056 | 0.75    |
|                                     |        |       |       |       |       |       |       |         |
| <i>Any Hypertension</i>             | All    | 0.193 | 0.181 | 0.204 | 0.309 | 0.284 | 0.335 | <0.0001 |
|                                     | Males  | 0.244 | 0.225 | 0.263 | 0.394 | 0.360 | 0.429 | <0.0001 |
|                                     | Female | 0.142 | 0.127 | 0.156 | 0.228 | 0.195 | 0.261 | <0.0001 |
|                                     |        |       |       |       |       |       |       |         |
| <i>Any High Cholesterol</i>         | All    | 0.097 | 0.086 | 0.107 | 0.159 | 0.138 | 0.181 | <0.0001 |
|                                     | Males  | 0.144 | 0.125 | 0.162 | 0.230 | 0.198 | 0.262 | <0.0001 |
|                                     | Female | 0.049 | 0.037 | 0.060 | 0.094 | 0.071 | 0.116 | 0.0005  |

|                     |        |       |       |       |       |       |       |        |
|---------------------|--------|-------|-------|-------|-------|-------|-------|--------|
|                     |        |       |       |       |       |       |       |        |
| <i>Any Diabetes</i> | All    | 0.073 | 0.063 | 0.082 | 0.084 | 0.068 | 0.100 | 0.21   |
|                     | Males  | 0.080 | 0.067 | 0.092 | 0.094 | 0.069 | 0.119 | 0.3006 |
|                     | Female | 0.059 | 0.045 | 0.073 | 0.076 | 0.055 | 0.097 | 0.17   |

**Table 2 Footnote.** Results presented are for model 1, exploring country differences in health outcomes between the UK and US. Note: BP is Blood pressure; high cholesterol measured by total cholesterol (TC) to High-density lipoprotein (HDL) ratio; HbA1c is Glycated haemoglobin (blood sugar levels). Outcomes labelled “any” refer to biomarkers that have been supplemented with medication use, therefore indicating a positive diagnosis of diseases. \* P-value is for Wald test, indicating a statistical difference between countries.

**Figure 1.** Predicted probabilities from modified Poisson regression, comparing health indicators between Britain and the US, by sex (Model 1).

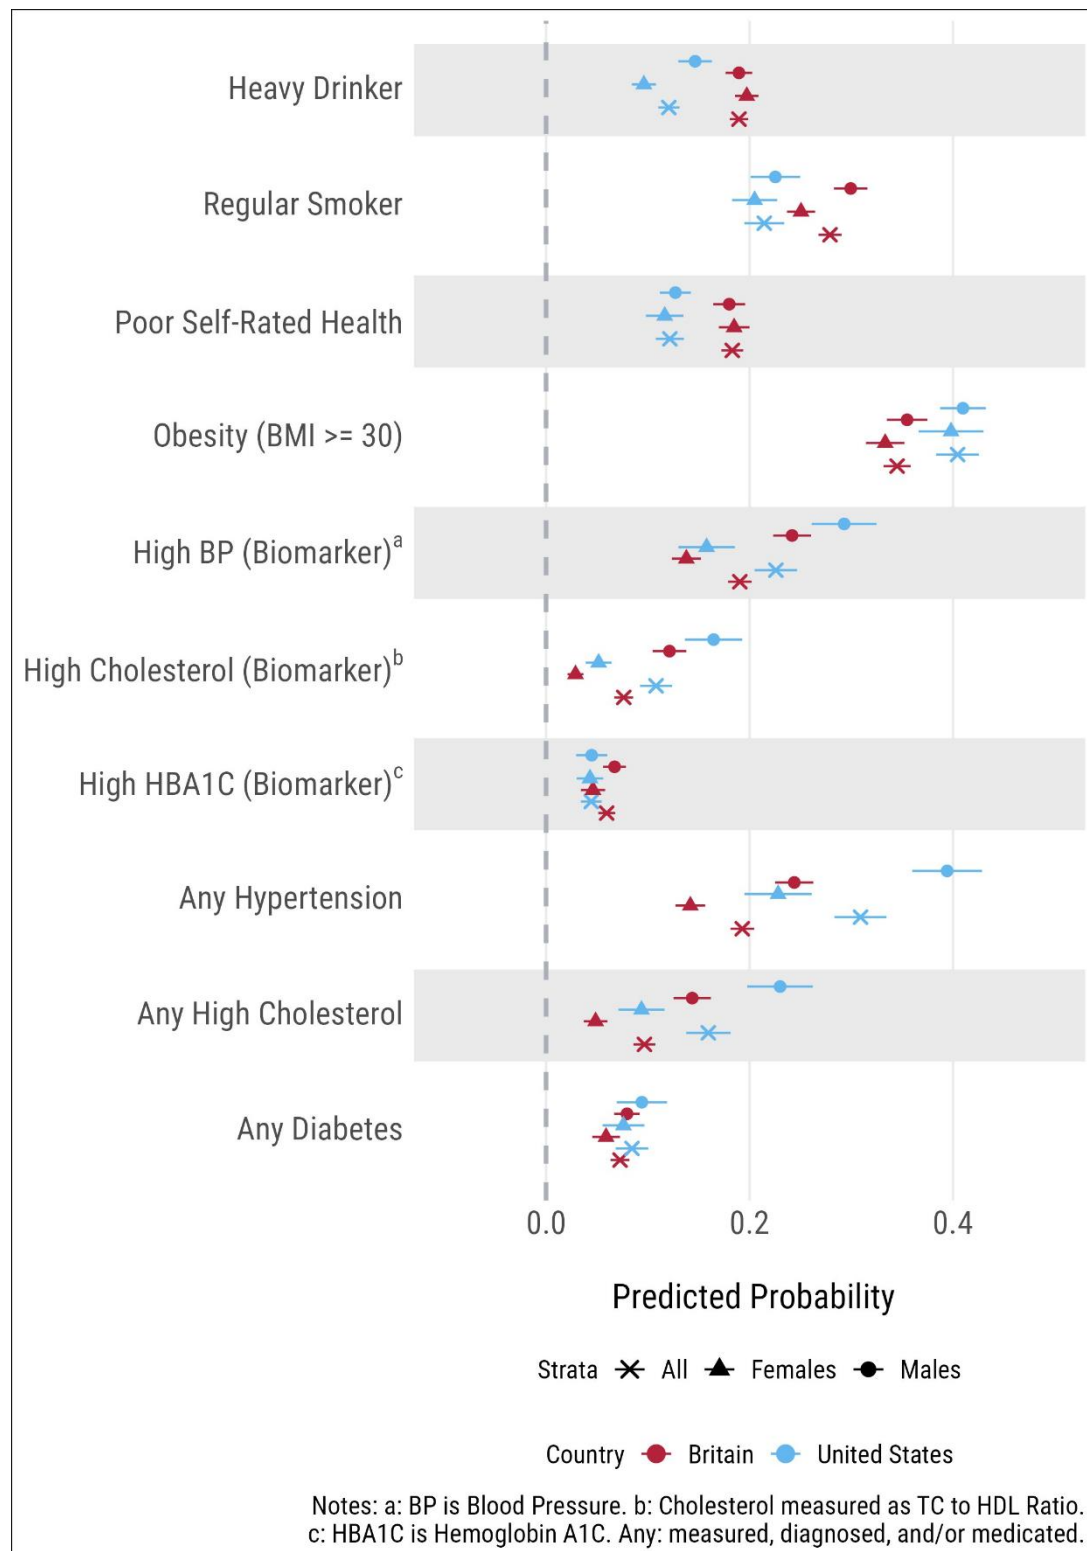

**Figure 1 Footnote:** *Predicted probabilities from modified Poisson regression, comparing health indicators between Britain and the US in the whole sample and stratified by sex (Model 1). Outcomes labelled “any” refer to biomarkers that have been supplemented with medication use, therefore indicating a positive diagnosis of diseases.*

**Figure 2.** Predicted probabilities from modified Poisson regression showing socioeconomic inequalities in midlife health between Britain and the US (Model 2a, 2b and 2c).

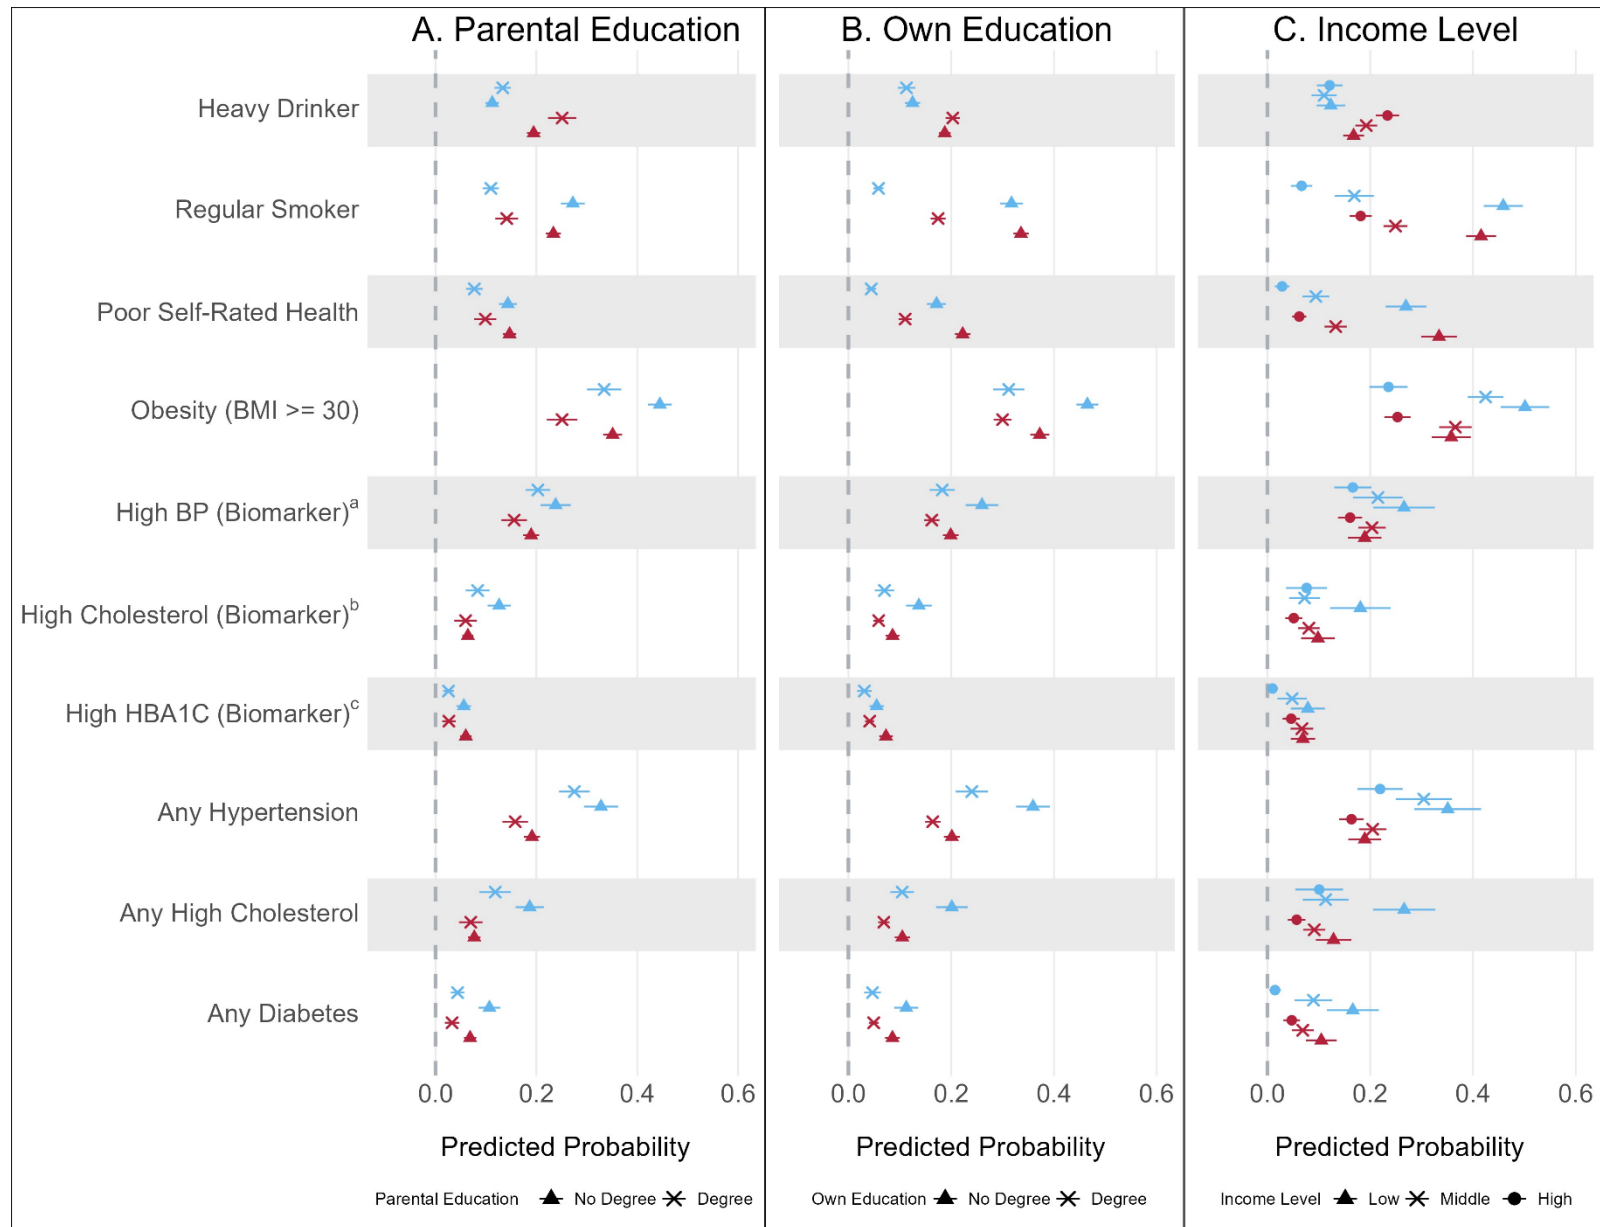



**Figure 2 Footnote:** Predicted probabilities from modified Poisson regression, comparing socioeconomic inequalities in health indicators between Britain and the US (Model 2). Measures of SEP are parental education (Model 2a), the cohorts own education level (Model 2b), and household income quintiles (Model 2c, only the first, third and fifth quintiles presented in the figure). Note: a) BP is Blood pressure; b) is cholesterol measured by total cholesterol (TC) to High-density lipoprotein (HDL) ratio; c) HbA1c is Glycated haemoglobin (blood sugar levels). Outcomes labelled “any” refer to biomarkers that have been supplemented with medication use, therefore indicating a positive diagnosis of diseases.

**Figure 3.** Predicted probabilities from modified Poisson regression of associations with parental education, adjusted for cohort members own SEP (education level and household income) in adulthood (Model 3).

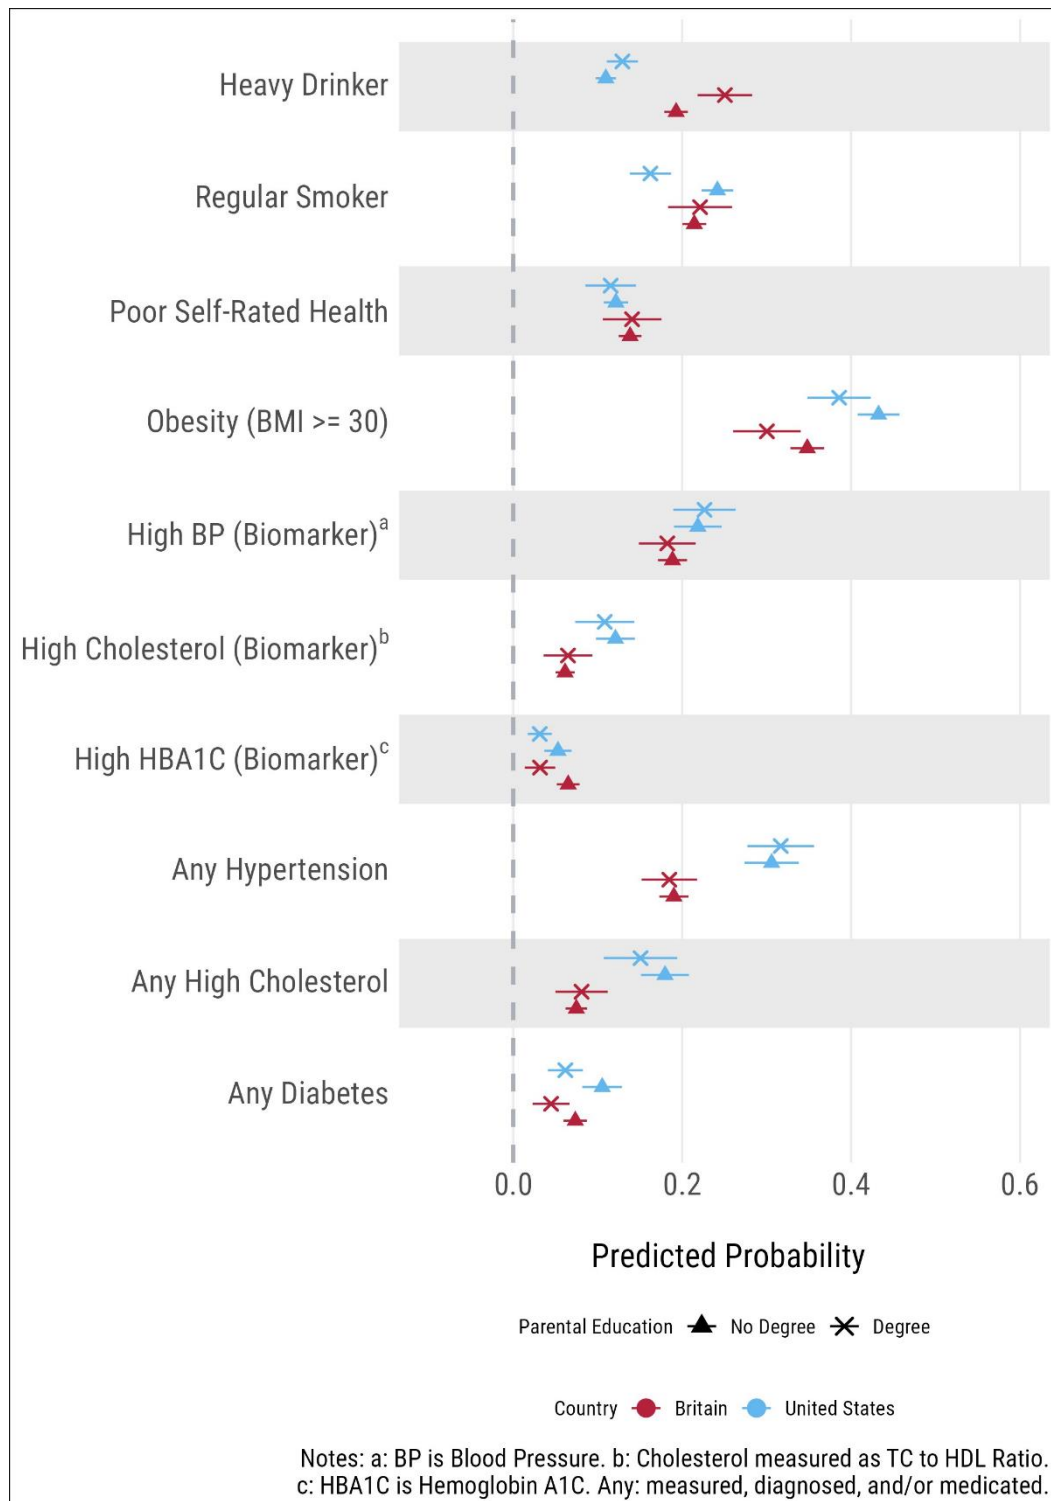

**Figure 3 Footnote:** *Predicted probabilities from modified Poisson regression of associations with parental education, making adjustment for cohort members own SEP (education level and household income) in adulthood (Model 3). Outcomes labelled “any” refer to biomarkers that have been supplemented with medication use, therefore indicating a positive diagnosis of diseases.*

## References

1. Zaninotto P, Head J, Steptoe A. Behavioural risk factors and healthy life expectancy: evidence from two longitudinal studies of ageing in England and the US. *Sci Rep*. 2020;10(1):6955.
2. Banks J, Marmot M, Oldfield Z, Smith JP. Disease and disadvantage in the United States and in England. *JAMA*. 2006;295(17):2037-45.
3. Banks J, Muriel A, Smith JP. Disease prevalence, disease incidence, and mortality in the United States and in England. *Demography*. 2010;47 Suppl:S211-31.
4. Pongiglione B, Ploubidis GB, Dowd JB. Older Adults in the United States Have Worse Cardiometabolic Health Compared to England. *J Gerontol B-Psychol*. 2022;77(Suppl 2):S167-S76.
5. Martinson ML, Teitler JO, Reichman NE. Health Across the Life Span in the United States and England. *Am J Epidemiol*. 2011;173(8):858-65.
6. Jain U, Min J, Lee J. Harmonization of cross-national studies of aging to the Health and Retirement Study - user guide: Family transfer - informal care. CESR-Schaeffer Working Paper Series No 2016-008. 2016.
7. Lachman ME. Development in midlife. *Annu Rev Psychol*. 2004;55:305-31.
8. Lachman ME, Teshale S, Agrigoroaei S. Midlife as a pivotal period in the life course: Balancing growth and decline at the crossroads of youth and old age. *Int J Behav Dev*. 2015;39(1):20-31.
9. Casagrande SS, Menke A, Cowie CC. Cardiovascular Risk Factors of Adults Age 20-49 Years in the United States, 1971-2012: A Series of Cross-Sectional Studies. *PLoS One*. 2016;11(8).
10. Martinson ML, Lapham J, Ercin-Swearinger H, Teitler JO, Reichman NE. Generational Shifts in Young Adult Cardiovascular Health? Millennials and Generation X in the United States and England. *J Gerontol B Psychol Sci Soc Sci*. 2022;77(Suppl\_2):S177-S88.
11. Martinson ML. Income Inequality in Health at All Ages: A Comparison of the United States and England. *Am J Public Health*. 2012;102(11):2049-56.

12. Gondek D, Bann D, Brown M, Hamer M, Sullivan A, Ploubidis GB. Prevalence and early-life determinants of mid-life multimorbidity: evidence from the 1970 British birth cohort. *BMC Public Health*. 2021;21(1):1319.
13. Pavela G, Latham K. Childhood Conditions and Multimorbidity Among Older Adults. *J Gerontol B-Psychol*. 2016;71(5):889-901.
14. Mackenbach JP, Bopp M, Deboosere P, Kovacs K, Leinsalu M, Martikainen P, et al. Determinants of the magnitude of socioeconomic inequalities in mortality: A study of 17 European countries. *Health Place*. 2017;47:44-53.
15. Mackenbach JP, Cavelaars AE, Kunst AE, Groenhouf F. Socioeconomic inequalities in cardiovascular disease mortality; an international study. *Eur Heart J*. 2000;21(14):1141-51.
16. Mackenbach JP, Stirbu I, Roskam AJ, Schaap MM, Menvielle G, Leinsalu M, et al. Socioeconomic inequalities in health in 22 European countries. *N Engl J Med*. 2008;358(23):2468-81.
17. Lake A, Townshend T. Obesogenic environments: exploring the built and food environments. *J R Soc Promot Health*. 2006;126(6):262-7.
18. Sullivan A, Brown M, Hamer M, Ploubidis GB. Cohort Profile Update: The 1970 British Cohort Study (BCS70). *Int J Epidemiol*. 2022.
19. Harris KM, Halpern CT, Whitsel EA, Hussey JM, Killeya-Jones LA, Tabor J, et al. Cohort Profile: The National Longitudinal Study of Adolescent to Adult Health (Add Health). *Int J Epidemiol*. 2019;48(5):1415-+.
20. Norris T, Hamer M, Hardy R, Li L, Ong KK, Ploubidis GB, et al. Changes over time in latent patterns of childhood-to-adulthood BMI development in Great Britain: evidence from three cohorts born in 1946, 1958, and 1970. *BMC Med*. 2021;19(1).
21. Gondek D. We are living longer, but not healthier: evidence from the British birth cohorts and the Uppsala Birth Cohort Multigenerational Study. London: University College London; 2020.
22. Gondek D, Bann D, Patalay P, Goodman A, McElroy E, Richards M, et al. Psychological distress from early adulthood to early old age: evidence from the 1946, 1958 and 1970 British birth cohorts. *Psychol Med*. 2022;52(8):1471-80.

23. Case A, Deaton A. Rising morbidity and mortality in midlife among white non-Hispanic Americans in the 21st century. *Proc Natl Acad Sci U S A*. 2015;112(49):15078-83.
24. Decade of healthy ageing: baseline report. Geneva:World Health Organization (WHO). Licence: CC BY-NC-SA 3.0 IGO.; 2020.
25. Davies HT, Marshall MN. UK and US health-care systems: divided by more than a common language. *Lancet*. 2000;355(9201):336.
26. In: Woolf SH, Aron L, editors. *US Health in International Perspective: Shorter Lives, Poorer Health*. The National Academies Collection: Reports funded by National Institutes of Health. Washington (DC)2013.
27. Pickett KE, Wilkinson RG. Income inequality and health: A causal review. *Soc Sci Med*. 2015;128:316-26.
